# Supplementary material for: Value of Combined PET Imaging with [18F]FDG and [68Ga]Ga-PSMA-11 in mCRPC Patients with Worsening Disease during [177Lu]Lu-PSMA-617 RLT
Source: MDPI journal article supplement (doi:10.3390/cancers13164134), 2021-08-17
Supplement: s1 [file s1]

# Supplementary Materials: Value of Combined PET Imaging with [ $^{18}\text{F}$ ]FDG and [ $^{68}\text{Ga}$ ]Ga-PSMA-11 in mCRPC Patients with Worsening Disease during [ $^{177}\text{Lu}$ ]Lu-PSMA-617 RLT

Fadi Khreish, Kalle Ribbat, Mark Bartholomä, Stephan Maus, Tobias Stemler, Ina Hierlmeier, Johannes Linxweiler, Mathias Schreckenberger, Samer Ezziddin and Florian Rosar

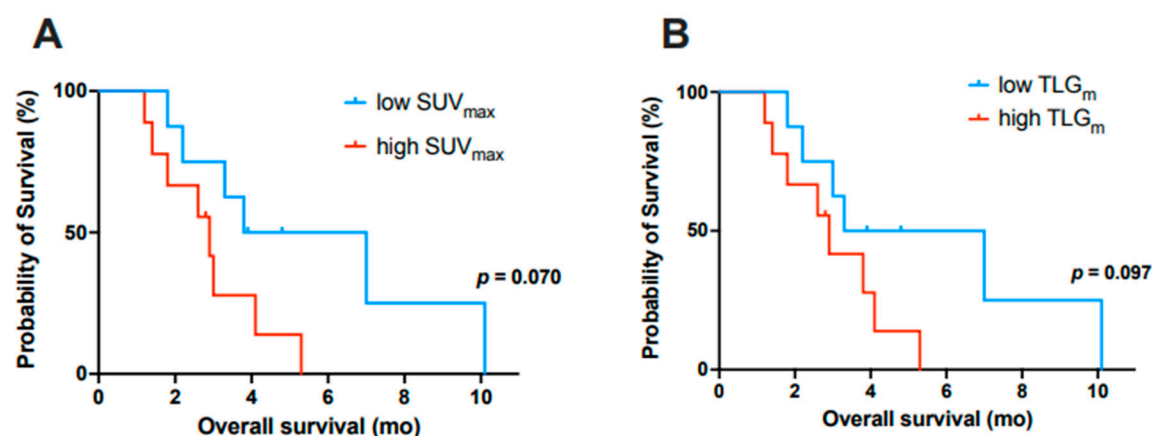

**Figure S1.** Kaplan-Meier curves for OS (from the time point of combined [ $^{18}\text{F}$ ]FDG and [ $^{68}\text{Ga}$ ]Ga-PSMA-11 PET imaging) in patients with mismatch findings ( $n = 17$ ) stratified by (A) low/high  $\text{SUV}_{\text{max}}$  (cut-off value: 16.8): median OS 3.8 mo (95% CI 0.4–7.2 mo.)/ 2.9 mo (95% CI 2.2–3.6 mo.), (B) low/high  $\text{TLG}_m$  (cut-off value: 607.8 mL  $\times$  SUV): median OS 3.3 mo (95% CI 0–7.0 mo)/2.9 mo (95% CI 2.1–3.6 mo). OS: overall survival;  $\text{SUV}_{\text{max}}$ : maximal standardized uptake value of the mismatch lesion with the highest [ $^{18}\text{F}$ ]FDG uptake; CI: confidence interval;  $\text{TLG}_m$ : total lesion glycolysis of all mismatch lesions.

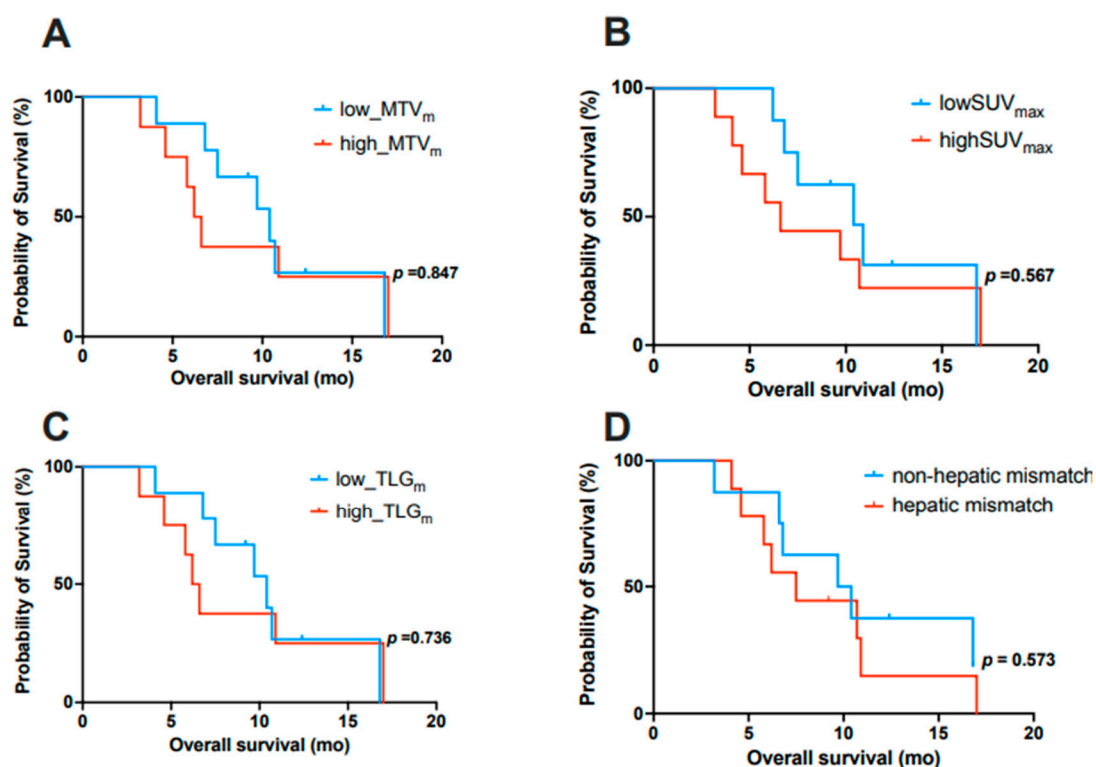

**Figure S2.** Kaplan-Meier curves for OS (from the start of [ $^{177}\text{Lu}$ ]Lu-PSMA-617 radioligand therapy) in patients with mismatch findings ( $n = 17$ ) stratified by (A) low/high MTV<sub>m</sub> (cut-off value: 74.4 mL), (B) low/high SUV<sub>max</sub> (cut-off value: 16.8), (C) low/high TLG<sub>m</sub> (cut-off value: 607.8 mL  $\times$  SUV), (D) presence or absence of hepatic mismatch lesions. OS: overall survival; MTV<sub>m</sub>: metabolic tumor volume of all mismatch lesions; SUV<sub>max</sub>: maximal standardized uptake value of the mismatch lesion with the highest [ $^{18}\text{F}$ ]FDG uptake; TLG<sub>m</sub>: total lesion glycolysis of all mismatch lesions.
